# Supplementary material for: Dual Cannabinoid and Orexin Regulation of Anhedonic Behaviour Caused by Prolonged Restraint Stress
Source: MDPI journal article supplement (doi:10.3390/brainsci13020314), 2023-02-13
Supplement: s1 [file s1]

# **Dual cannabinoid and orexin regulation of anhedonic behaviour caused by prolonged restraint stress**

Hye Ji J. Kim <sup>1</sup>, Ayat Zagzoog <sup>a</sup>, Costanza Ceni <sup>1,2,3</sup>, Rebecca Ferrisi <sup>1,2</sup>, Nicola Janz <sup>1</sup>, Robert B. Laprairie <sup>1,4,\*</sup>

<sup>1</sup> College of Pharmacy and Nutrition, University of Saskatchewan, Saskatoon SK, Canada

<sup>2</sup> Department of Pharmacy, University of Pisa, Pisa, Italy

<sup>3</sup> Doctoral School in Life Sciences, University of Siena, Siena, Italy

<sup>4</sup> Department of Pharmacology, College of Medicine, Dalhousie University, Halifax NS, Canada

\* Correspondence: robert.laprairie@usask.ca

## **Supplementary Materials**

## Supplementary Figures

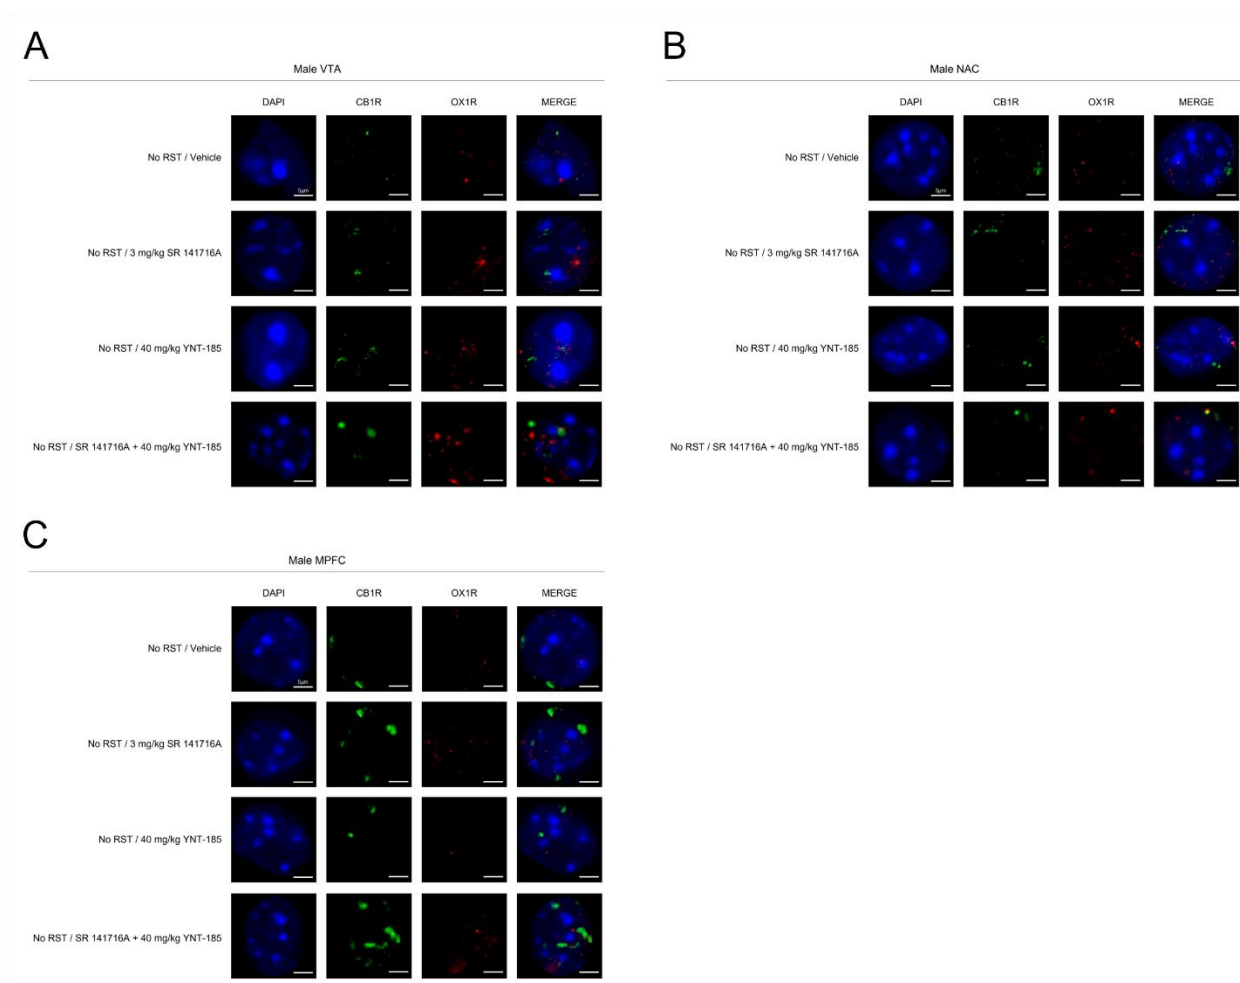

**Figure S1.** Representative images of CB1R-OX1R colocalization in males. VTA (A), NAC (B), and MPFC (C) tissue. Images were taken on a Zeiss LSM880 confocal microscope then processed using ImageJ (version 2.1.0) with the FIJI extension.

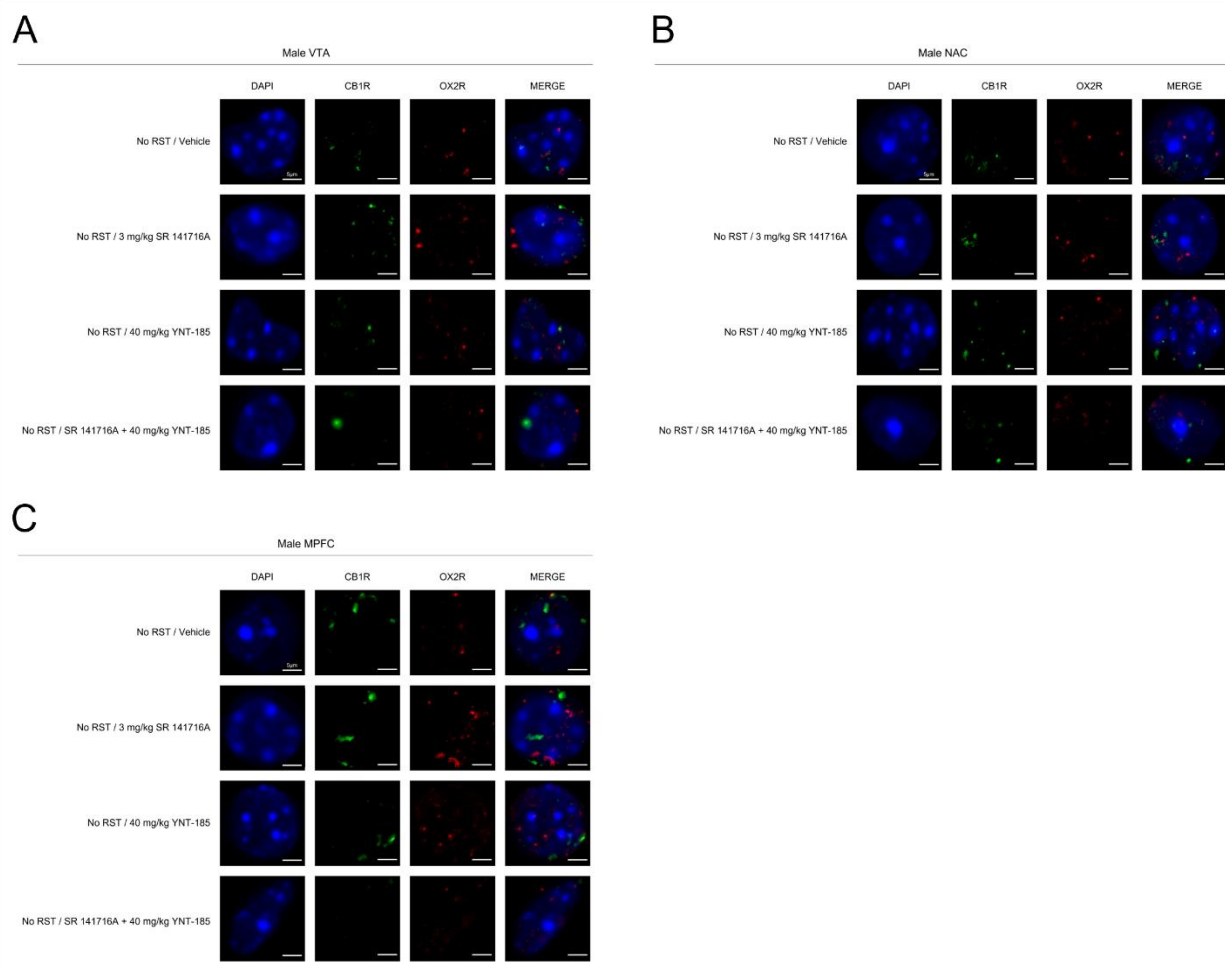

**Figure S2.** Representative images of CB1R-OX2R colocalization in males. VTA (**A**), NAC (**B**), and MPFC (**C**) tissue. Images were taken on a Zeiss LSM880 confocal microscope then processed using ImageJ (version 2.1.0) with the FIJI extension.

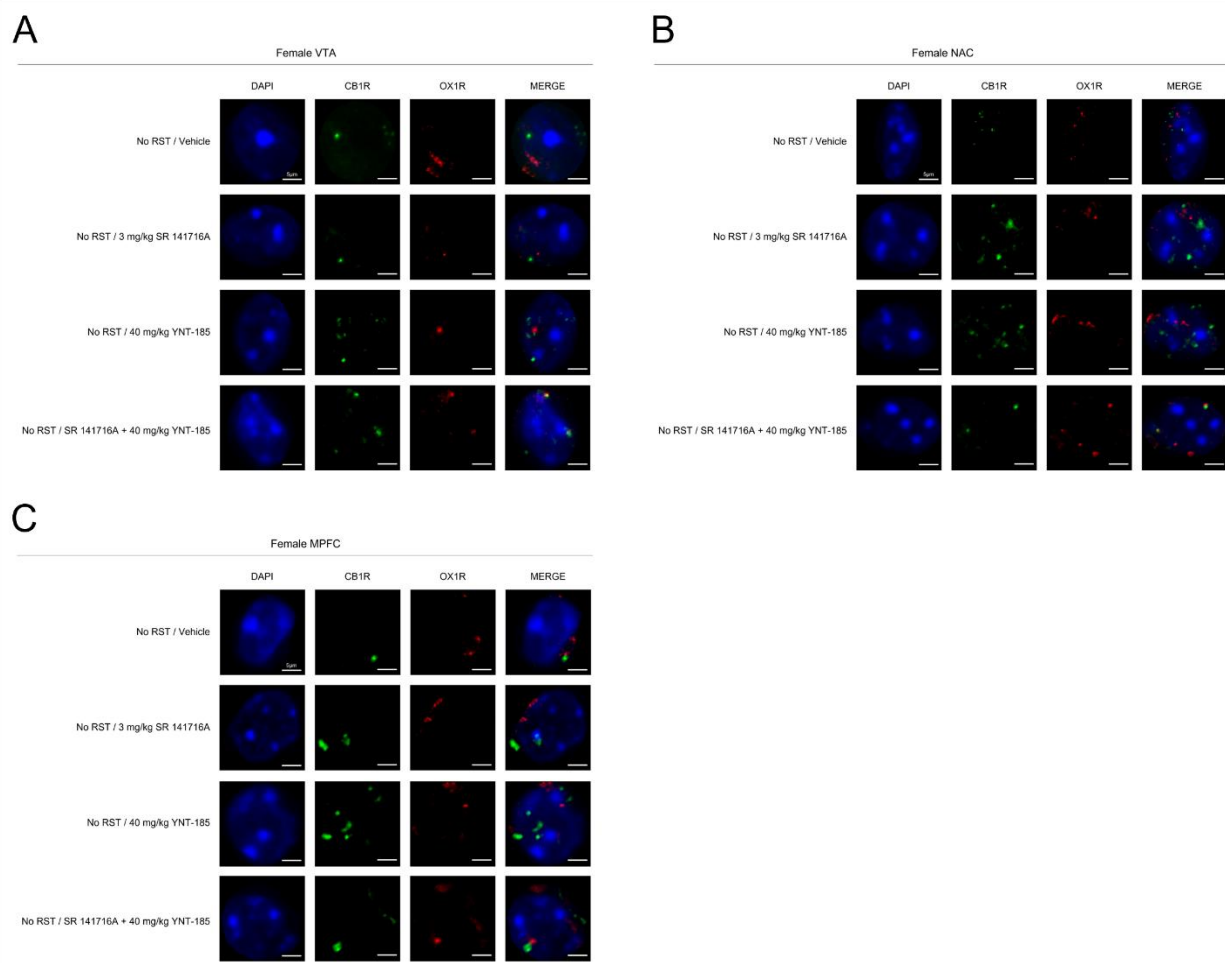

**Figure S3.** Representative images of CB1R-OX1R colocalization in females. VTA (**A**), NAC (**B**), and MPFC (**C**) tissue. Images were taken on a Zeiss LSM880 confocal microscope then processed using ImageJ (version 2.1.0) with the FIJI extension.

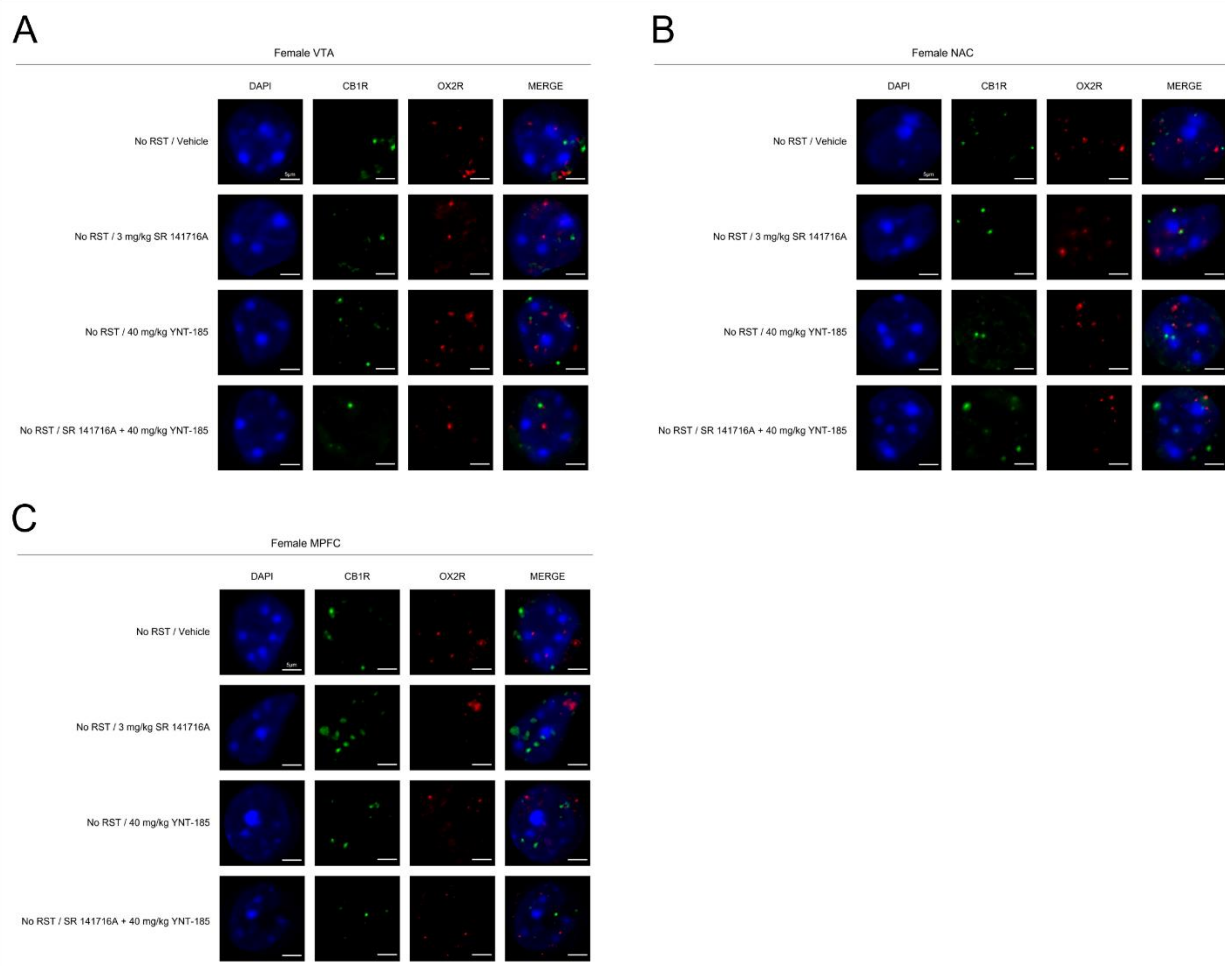

**Figure S4.** Representative images of CB1R-OX2R colocalization in females. VTA (**A**), NAC (**B**), and MPFC (**C**) tissue. Images were taken on a Zeiss LSM880 confocal microscope then processed using ImageJ (version 2.1.0) with the FIJI extension.

## Supplementary Tables

| <b>Table S1.</b> Figure 2A Multiple Comparisons (p-value) | <b>RST</b> | <b>To Vehicle within -RST</b> | <b>To Vehicle within +RST</b> |
|-----------------------------------------------------------|------------|-------------------------------|-------------------------------|
| Vehicle                                                   | <0.001     |                               |                               |
| 0.3 mg/kg CP55,940                                        | <0.001     | >0.9999                       | 0.3108                        |
| 1 mg/kg TCS-1102                                          | <0.001     | >0.9999                       | 0.9561                        |
| 0.3 mg/kg CP55,940 +1 mg/kg TCS-1102                      | <0.001     | >0.9999                       | 0.9779                        |
| 3 mg/kg SR141716A                                         | 0.001      | 0.9128                        | 0.0048                        |
| 40 mg/kg YNT-185                                          | 0.7458     | >0.9999                       | <0.0001                       |
| 3 mg/kg SR141716A + 40 mg/kg YNT-185                      | >0.9999    | 0.9878                        | <0.0001                       |

| <b>Table S2.</b> Figure 2A ANOVA | <b>F(DFn,DFd)</b> |
|----------------------------------|-------------------|
| RST                              | F (1, 70) = 197.1 |
| Treatment                        | F (6, 70) = 9.781 |
| Interaction                      | F (6, 70) = 10.40 |

**Table S3.** Figure 2B Multiple Comparisons (p-value)

|                                      | <b>RST</b> | <b>To Vehicle within -RST</b> | <b>To Vehicle within +RST</b> |
|--------------------------------------|------------|-------------------------------|-------------------------------|
| Vehicle                              | <0.0001    |                               |                               |
| 0.3 mg/kg CP55,940                   | 0.0010     | >0.9999                       | >0.9999                       |
| 1 mg/kg TCS-1102                     | 0.0892     | 0.7169                        | >0.9999                       |
| 0.3 mg/kg CP55,940 +1 mg/kg TCS-1102 | 0.1901     | 0.4467                        | >0.9999                       |
| 3 mg/kg SR141716A                    | <0.0001    | 0.9794                        | >0.9999                       |
| 40 mg/kg YNT-185                     | 0.2867     | 0.9776                        | 0.9909                        |
| 3 mg/kg SR141716A + 40 mg/kg YNT-185 | >0.9999    | 0.1095                        | 0.3060                        |

**Table S4.** Figure 2B ANOVA**F(DFn,DFd)**

|             |                   |
|-------------|-------------------|
| RST         | F (1, 70) = 88.91 |
| Treatment   | F (6, 70) = 1.957 |
| Interaction | F (6, 70) = 5.003 |

**Table S5.** Figure 2C Multiple Comparisons (p-value)

|                                      | <b>RST</b> | <b>To Vehicle within -RST</b> | <b>To Vehicle within +RST</b> |
|--------------------------------------|------------|-------------------------------|-------------------------------|
| Vehicle                              | 0.5960     |                               |                               |
| 0.3 mg/kg CP55,940                   | 0.9928     | 0.8103                        | 0.9997                        |
| 1 mg/kg TCS-1102                     | 0.9999     | 0.7269                        | >0.9999                       |
| 0.3 mg/kg CP55,940 +1 mg/kg TCS-1102 | 0.9952     | 0.8383                        | >0.9999                       |
| 3 mg/kg SR141716A                    | 0.9977     | 0.9336                        | >0.9999                       |
| 40 mg/kg YNT-185                     | >0.9999    | 0.8482                        | >0.9999                       |
| 3 mg/kg SR141716A + 40 mg/kg YNT-185 | >0.9999    | >0.9999                       | 0.9717                        |

**Table S6.** Figure 2C ANOVA**F(DFn,DFd)**

|             |                    |
|-------------|--------------------|
| RST         | F (1, 70) = 7.797  |
| Treatment   | F (6, 70) = 2.008  |
| Interaction | F (6, 70) = 0.4506 |



**Table S7.** Figure 2D Multiple Comparisons (p-value)

|                                      | <b>RST</b> | <b>To Vehicle within -RST</b> | <b>To Vehicle within +RST</b> |
|--------------------------------------|------------|-------------------------------|-------------------------------|
| Vehicle                              | <0.0001    |                               |                               |
| 0.3 mg/kg CP55,940                   | 0.0012     | 0.9991                        | >0.9999                       |
| 1 mg/kg TCS-1102                     | 0.0991     | 0.4998                        | >0.9999                       |
| 0.3 mg/kg CP55,940 +1 mg/kg TCS-1102 | 0.1665     | 0.2961                        | >0.9999                       |
| 3 mg/kg SR141716A                    | <0.0001    | 0.9996                        | >0.9999                       |
| 40 mg/kg YNT-185                     | 0.2945     | 0.9004                        | 0.9977                        |
| 3 mg/kg SR141716A + 40 mg/kg YNT-185 | >0.9999    | 0.1216                        | 0.2353                        |

**Table S8.** Figure 2D ANOVA**F(DFn,DFd)**

|             |                   |
|-------------|-------------------|
| RST         | F (1, 70) = 88.30 |
| Treatment   | F (6, 70) = 2.015 |
| Interaction | F (6, 70) = 4.836 |

**Table S9.** Figure 3C Multiple Comparisons (p-value)

|                                      | <b>RST</b> | <b>To Vehicle within -RST</b> | <b>To Vehicle within +RST</b> |
|--------------------------------------|------------|-------------------------------|-------------------------------|
| Vehicle                              | >0.9999    |                               |                               |
| 0.3 mg/kg CP55,940                   | 0.9684     | >0.9999                       | >0.9999                       |
| 1 mg/kg TCS-1102                     | >0.9999    | >0.9999                       | >0.9999                       |
| 0.3 mg/kg CP55,940 +1 mg/kg TCS-1102 | 0.6972     | >0.9999                       | 0.9154                        |
| 3 mg/kg SR141716A                    | 0.9985     | >0.9999                       | >0.9999                       |
| 40 mg/kg YNT-185                     | >0.9999    | 0.9915                        | 0.9999                        |
| 3 mg/kg SR141716A + 40 mg/kg YNT-185 | >0.9999    | >0.9999                       | >0.9999                       |

**Table S10.** Figure 3C ANOVA **F(DFn,DFd)**

|             |                    |
|-------------|--------------------|
| RST         | F (1, 70) = 6.465  |
| Treatment   | F (6, 70) = 1.351  |
| Interaction | F (6, 70) = 0.4251 |

**Table S11.** Figure 4A Multiple Comparisons (p-value)

|                                      | <b>RST</b> | <b>To Vehicle within -RST</b> | <b>To Vehicle within +RST</b> |
|--------------------------------------|------------|-------------------------------|-------------------------------|
| Vehicle                              | 0.7095     |                               |                               |
| 0.3 mg/kg CP55,940                   | >0.9999    | >0.9999                       | 0.9983                        |
| 1 mg/kg TCS-1102                     | 0.9999     | >0.9999                       | >0.9999                       |
| 0.3 mg/kg CP55,940 +1 mg/kg TCS-1102 | >0.9999    | >0.9999                       | 0.9932                        |
| 3 mg/kg SR141716A                    | 0.9996     | >0.9999                       | >0.9999                       |
| 40 mg/kg YNT-185                     | >0.9999    | >0.9999                       | 0.9973                        |
| 3 mg/kg SR141716A + 40 mg/kg YNT-185 | 0.9826     | >0.9999                       | >0.9999                       |

**Table S12.** Figure 4A ANOVA **F(DFn,DFd)**

|             |                    |
|-------------|--------------------|
| RST         | F (1, 58) = 5.613  |
| Treatment   | F (6, 58) = 0.3170 |
| Interaction | F (6, 58) = 0.3468 |

**Table S13.** Figure 5A Multiple Comparisons (p-value)

|                                      | <b>RST</b> | <b>To Vehicle within -RST</b> | <b>To Vehicle within +RST</b> |
|--------------------------------------|------------|-------------------------------|-------------------------------|
| Vehicle                              | 0.9994     |                               |                               |
| 3 mg/kg SR141716A                    | 0.9931     | >0.9999                       | 0.9821                        |
| 40 mg/kg YNT-185                     | 0.3902     | 0.9613                        | 0.9993                        |
| 3 mg/kg SR141716A + 40 mg/kg YNT-185 | 0.9983     | 0.0051                        | <0.0001                       |

**Table S14.** Figure 5A ANOVA **F(DFn,DFd)**

|             |                    |
|-------------|--------------------|
| RST         | F (1, 72) = 0.4007 |
| Treatment   | F (3, 72) = 18.60  |
| Interaction | F (3, 72) = 1.853  |

**Table S15.** Figure 5B Multiple Comparisons (p-value)

|                                      | <b>RST</b> | <b>To Vehicle within -RST</b> | <b>To Vehicle within +RST</b> |
|--------------------------------------|------------|-------------------------------|-------------------------------|
| Vehicle                              | 0.0889     |                               |                               |
| 3 mg/kg SR141716A                    | >0.9999    | 0.9998                        | 0.3905                        |
| 40 mg/kg YNT-185                     | 0.9902     | 0.9301                        | 0.9888                        |
| 3 mg/kg SR141716A + 40 mg/kg YNT-185 | 0.9633     | <0.0001                       | 0.1677                        |

**Table S16.** Figure 5B ANOVA **F(DFn,DFd)**

|             |                   |
|-------------|-------------------|
| RST         | F (1, 72) = 2.211 |
| Treatment   | F (3, 72) = 24.05 |
| Interaction | F (3, 72) = 2.692 |

**Table S17.** Figure 5C Multiple Comparisons (p-value)

|                                      | <b>RST</b> | <b>To Vehicle within -RST</b> | <b>To Vehicle within +RST</b> |
|--------------------------------------|------------|-------------------------------|-------------------------------|
| Vehicle                              | 0.0147     |                               |                               |
| 3 mg/kg SR141716A                    | >0.9999    | 0.9995                        | 0.0014                        |
| 40 mg/kg YNT-185                     | 0.9980     | >0.9999                       | 0.1011                        |
| 3 mg/kg SR141716A + 40 mg/kg YNT-185 | >0.9999    | 0.0004                        | 0.9433                        |

**Table S18.** Figure 5C ANOVA **F(DFn,DFd)**

|             |                   |
|-------------|-------------------|
| RST         | F (1, 72) = 4.110 |
| Treatment   | F (3, 72) = 21.22 |
| Interaction | F (3, 72) = 2.999 |

**Table S19.** Figure 6A Multiple Comparisons (p-value)

|                                      | <b>RST</b> | <b>To Vehicle within -RST</b> | <b>To Vehicle within +RST</b> |
|--------------------------------------|------------|-------------------------------|-------------------------------|
| Vehicle                              | 0.9964     |                               |                               |
| 3 mg/kg SR141716A                    | 0.9935     | >0.9999                       | 0.7679                        |
| 40 mg/kg YNT-185                     | 0.7813     | >0.9999                       | 0.9946                        |
| 3 mg/kg SR141716A + 40 mg/kg YNT-185 | 0.1773     | >0.9999                       | 0.7541                        |

**Table S20.** Figure 6A ANOVA **F(DFn,DFd)**

|             |                   |
|-------------|-------------------|
| RST         | F (1, 72) = 4.122 |
| Treatment   | F (3, 72) = 1.611 |
| Interaction | F (3, 72) = 2.027 |

**Table S21.** Figure 6B Multiple Comparisons (p-value)

|                                      | <b>RST</b> | <b>To Vehicle within -RST</b> | <b>To Vehicle within +RST</b> |
|--------------------------------------|------------|-------------------------------|-------------------------------|
| Vehicle                              | 0.8555     |                               |                               |
| 3 mg/kg SR141716A                    | >0.9999    | 0.9467                        | >0.9999                       |
| 40 mg/kg YNT-185                     | 0.0149     | 0.0687                        | 0.5217                        |
| 3 mg/kg SR141716A + 40 mg/kg YNT-185 | 0.8555     | 0.0269                        | 0.9993                        |

**Table S22.** Figure 6B ANOVA **F(DFn,DFd)**

|             |                   |
|-------------|-------------------|
| RST         | F (1, 72) = 2.611 |
| Treatment   | F (3, 72) = 2.770 |
| Interaction | F (3, 72) = 4.671 |



**Table S23.** Figure 6C Multiple Comparisons (p-value)

|                                      | <b>RST</b> | <b>To Vehicle within -RST</b> | <b>To Vehicle within +RST</b> |
|--------------------------------------|------------|-------------------------------|-------------------------------|
| Vehicle                              | 0.9940     |                               |                               |
| 3 mg/kg SR141716A                    | 0.2636     | 0.9995                        | 0.1615                        |
| 40 mg/kg YNT-185                     | 0.8681     | 0.4887                        | 0.8525                        |
| 3 mg/kg SR141716A + 40 mg/kg YNT-185 | 0.3994     | 0.9755                        | >0.9999                       |

**Table S24.** Figure 6C ANOVA **F(DFn,DFd)**

|             |                    |
|-------------|--------------------|
| RST         | F (1, 72) = 0.8982 |
| Treatment   | F (3, 72) = 2.353  |
| Interaction | F (3, 72) = 3.951  |

**Table S25.** Figure 7A Multiple Comparisons (p-value)

|                                      | <b>RST</b> | <b>To Vehicle within -RST</b> | <b>To Vehicle within +RST</b> |
|--------------------------------------|------------|-------------------------------|-------------------------------|
| Vehicle                              | >0.9999    |                               |                               |
| 3 mg/kg SR141716A                    | >0.9999    | >0.9999                       | >0.9999                       |
| 40 mg/kg YNT-185                     | 0.9972     | >0.9999                       | 0.9979                        |
| 3 mg/kg SR141716A + 40 mg/kg YNT-185 | 0.0100     | 0.3400                        | <0.0001                       |

**Table S26.** Figure 7A ANOVA **F(DFn,DFd)**

|             |                   |
|-------------|-------------------|
| RST         | F (1, 72) = 5.337 |
| Treatment   | F (3, 72) = 15.69 |
| Interaction | F (3, 72) = 2.904 |

**Table S27.** Figure 7B Multiple Comparisons (p-value)

|                                      | <b>RST</b> | <b>To Vehicle within -RST</b> | <b>To Vehicle within +RST</b> |
|--------------------------------------|------------|-------------------------------|-------------------------------|
| Vehicle                              | 0.9213     |                               |                               |
| 3 mg/kg SR141716A                    | >0.9999    | 0.9997                        | 0.9971                        |
| 40 mg/kg YNT-185                     | 0.9934     | >0.9999                       | >0.9999                       |
| 3 mg/kg SR141716A + 40 mg/kg YNT-185 | >0.9999    | 0.0925                        | 0.5904                        |

**Table S28.** Figure 7B ANOVA **F(DFn,DFd)**

|             |                    |
|-------------|--------------------|
| RST         | F (1, 72) = 1.273  |
| Treatment   | F (3, 72) = 5.53   |
| Interaction | F (3, 72) = 0.2960 |

**Table S29.** Figure 7C Multiple Comparisons (p-value)

|                                      | <b>RST</b> | <b>To Vehicle within -RST</b> | <b>To Vehicle within +RST</b> |
|--------------------------------------|------------|-------------------------------|-------------------------------|
| Vehicle                              | 0.9810     |                               |                               |
| 3 mg/kg SR141716A                    | 0.2829     | 0.9957                        | 0.9974                        |
| 40 mg/kg YNT-185                     | 0.6569     | >0.9999                       | 0.9990                        |
| 3 mg/kg SR141716A + 40 mg/kg YNT-185 | 0.1758     | 0.6323                        | 0.0208                        |

**Table S30.** Figure 7C ANOVA **F(DFn,DFd)**

|             |                    |
|-------------|--------------------|
| RST         | F (1, 72) = 14.54  |
| Treatment   | F (3, 72) = 6.592  |
| Interaction | F (3, 72) = 0.5422 |

**Table S31.** Figure 8A Multiple Comparisons (p-value)

|                                      | <b>RST</b> | <b>To Vehicle within -RST</b> | <b>To Vehicle within +RST</b> |
|--------------------------------------|------------|-------------------------------|-------------------------------|
| Vehicle                              | 0.6977     |                               |                               |
| 3 mg/kg SR141716A                    | 0.9952     | 0.9988                        | 0.0641                        |
| 40 mg/kg YNT-185                     | 0.5720     | >0.9999                       | 0.9998                        |
| 3 mg/kg SR141716A + 40 mg/kg YNT-185 | 0.9943     | >0.9999                       | 0.2960                        |

**Table S32.** Figure 8A ANOVA **F(DFn,DFd)**

|             |                   |
|-------------|-------------------|
| RST         | F (1, 72) = 1.046 |
| Treatment   | F (3, 72) = 4.022 |
| Interaction | F (3, 72) = 2.150 |

**Table S33.** Figure 8B Multiple Comparisons (p-value)

|                                      | <b>RST</b> | <b>To Vehicle within -RST</b> | <b>To Vehicle within +RST</b> |
|--------------------------------------|------------|-------------------------------|-------------------------------|
| Vehicle                              | 0.9973     |                               |                               |
| 3 mg/kg SR141716A                    | >0.9999    | 0.9217                        | 0.9864                        |
| 40 mg/kg YNT-185                     | 0.9991     | 0.1613                        | 0.8626                        |
| 3 mg/kg SR141716A + 40 mg/kg YNT-185 | 0.9995     | 0.2111                        | 0.8946                        |

**Table S34.** Figure 8B ANOVA

|             | <b>F(DFn,DFd)</b>    |
|-------------|----------------------|
| RST         | F (1, 72) = 0.001529 |
| Treatment   | F (3, 72) = 3.467    |
| Interaction | F (3, 72) = 0.3912   |

**Table S35.** Figure 8B Multiple Comparisons (p-value)

|                                      | <b>RST</b> | <b>To Vehicle within -RST</b> | <b>To Vehicle within +RST</b> |
|--------------------------------------|------------|-------------------------------|-------------------------------|
| Vehicle                              | >0.9999    |                               |                               |
| 3 mg/kg SR141716A                    | 0.5237     | 0.1183                        | 0.0008                        |
| 40 mg/kg YNT-185                     | 0.5898     | 0.7578                        | 0.0482                        |
| 3 mg/kg SR141716A + 40 mg/kg YNT-185 | 0.9977     | 0.1951                        | 0.7578                        |

**Table S36.** Figure 8B ANOVA

|             | <b>F(DFn,DFd)</b> |
|-------------|-------------------|
| RST         | F (1, 72) = 2.947 |
| Treatment   | F (3, 72) = 8.917 |
| Interaction | F (3, 72) = 1.596 |
